# Supplementary material
Source: PubMed Central journal article supplement (PMC9274984)
Supplement: NIHMS1654027-supplement-Supplementary_Data.pdf [file NIHMS1654027-supplement-Supplementary_Data.pdf]

Supplementary Table 1. Characteristics of Uninfected Controls with Likely Indications for Statin Use, by Race/Ethnicity

|                      | Model 1          | p     | Model 2          | p     |
|----------------------|------------------|-------|------------------|-------|
| Black (vs. white)    | 0.93 (0.71-1.22) | 0.60  | 0.72 (0.54-0.97) | 0.03  |
| Hispanic (vs. white) | 0.82 (0.51-1.32) | 0.42  | 0.70 (0.43-1.14) | 0.15  |
| Age                  | 1.05 (1.03-1.06) | <0.01 | 1.04 (1.02-1.05) | <0.01 |
| Female Sex           | 0.79 (0.54-1.15) | 0.22  | 0.83 (0.56-1.22) | 0.34  |
| HTN                  |                  |       | 2.05 (1.51-2.78) | <0.01 |
| DM                   |                  |       | 1.43 (1.08-1.89) | 0.01  |
| CHD                  |                  |       | 1.36 (1.03-1.79) | 0.03  |
